# Supplementary material
Source: Royal Society of Chemistry journal article supplement (doi:10.1039/d6ma00515b)
Supplement: d6ma00515b1.pdf [file d6ma00515b1.pdf]

*Electronic Supplementary Information*

*for*

***In-situ* grown Synergistic Co-based metal-organic framework/graphene oxide composite  
for enhanced supercapacitor performance**

Soumen Khan,<sup>\*,[a, b]</sup> K. Padmasri,<sup>[c]</sup> Unmesha Mondal,<sup>[a]</sup> and Chanchal Chakraborty<sup>\*,[a, b]</sup>

[a] Department of Chemistry, Birla Institute of Technology & Science (BITS) Pilani, Hyderabad Campus, Jawaharnagar, Samirpet, Hyderabad, Telangana 500078, India.

E-mail: [chanchal@hyderabad.bits-pilani.ac.in](mailto:chanchal@hyderabad.bits-pilani.ac.in) (Dr. Chanchal Chakraborty)

[p20220015@hyderabad.bits-pilani.ac.in](mailto:p20220015@hyderabad.bits-pilani.ac.in) (Mr. Soumen Khan)

[b] Materials Center for Sustainable Energy & Environment (McSEE), Birla Institute of Technology & Science (BITS) Pilani, Hyderabad Campus. Jawaharnagar, Samirpet, Hyderabad, Telangana 500078, India.

[c] Department of Chemical Engineering, Birla Institute of Technology and Science-Pilani, Hyderabad Campus, Jawaharnagar, Samirpet, Hyderabad, Telangana 500078, India.

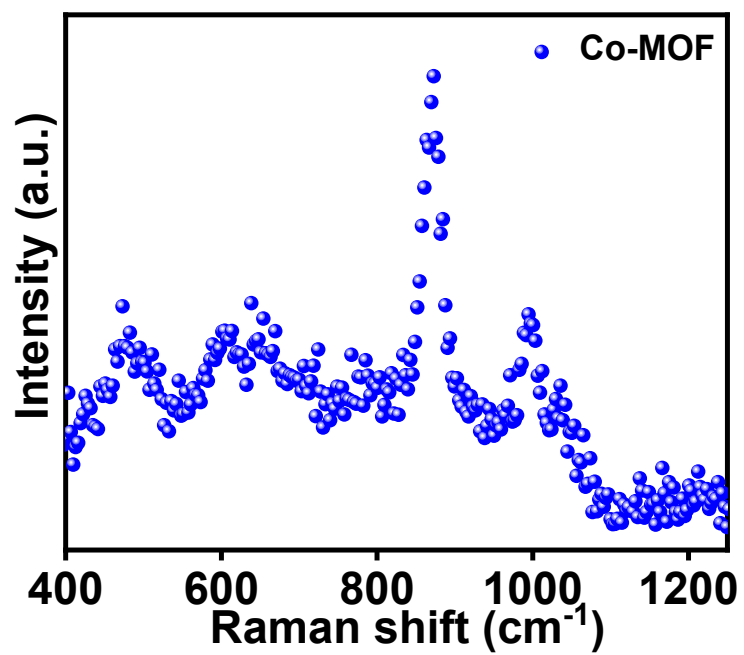

Fig. S1. Raman spectra of Co-MOF.

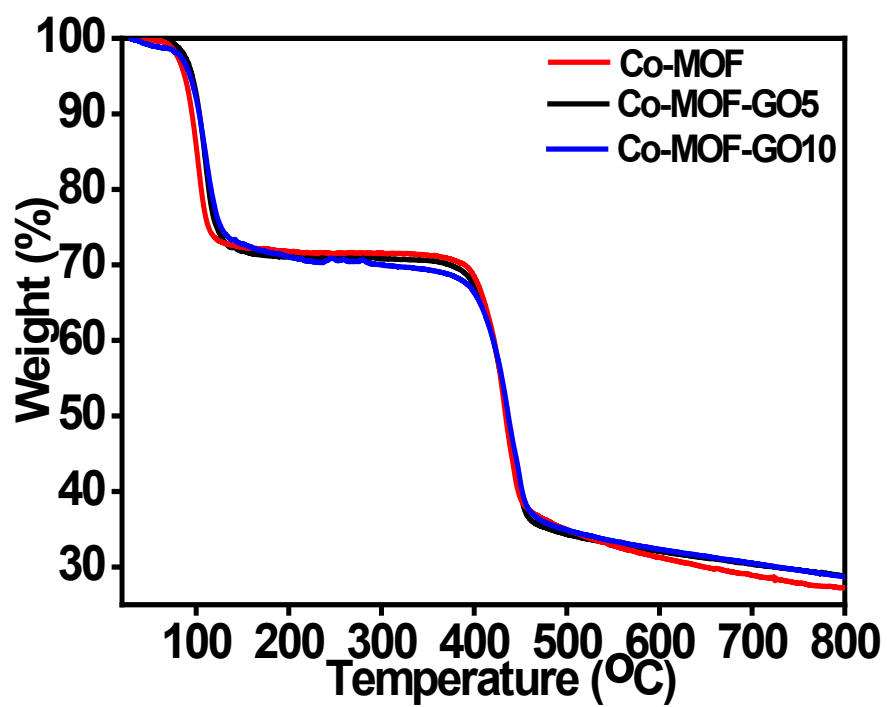

Fig. S2. Thermo-gravimetric (TG) analysis of as-synthesized Co-MOF, Co-MOF-GO-5, and Co-MOF-GO-10.

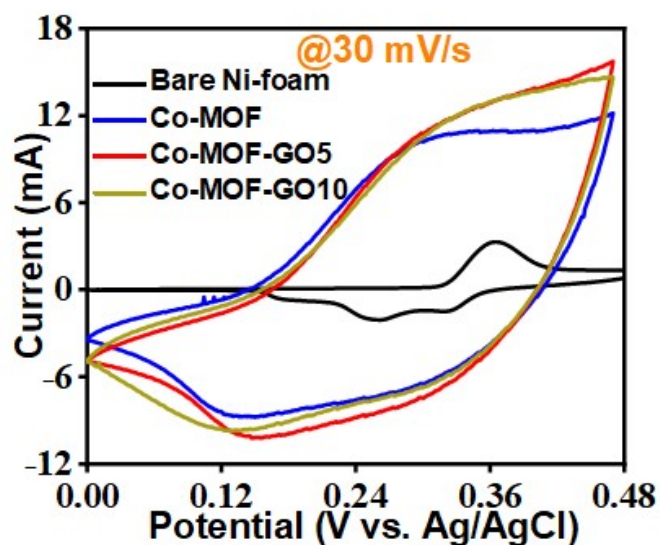

**Fig. S3.** Comparison of CV profile for bare Ni-foam, Co-MOF, Co-MOF-GO5, and Co-MOF-GO10 at  $30 \text{ mV s}^{-1}$ ; (b) GCD profile at various current densities for bare Ni-foam.

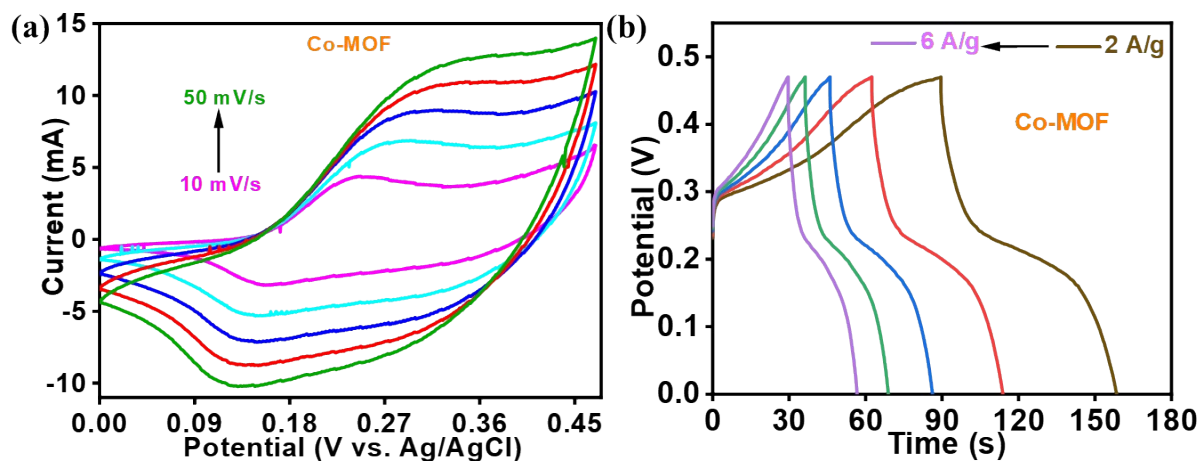

**Fig. S4.** (a) CV profile at different scan rates for Co-MOF at 10 to  $50 \text{ mV s}^{-1}$ ; (b) GCD profile at various current densities for Co-MOF.

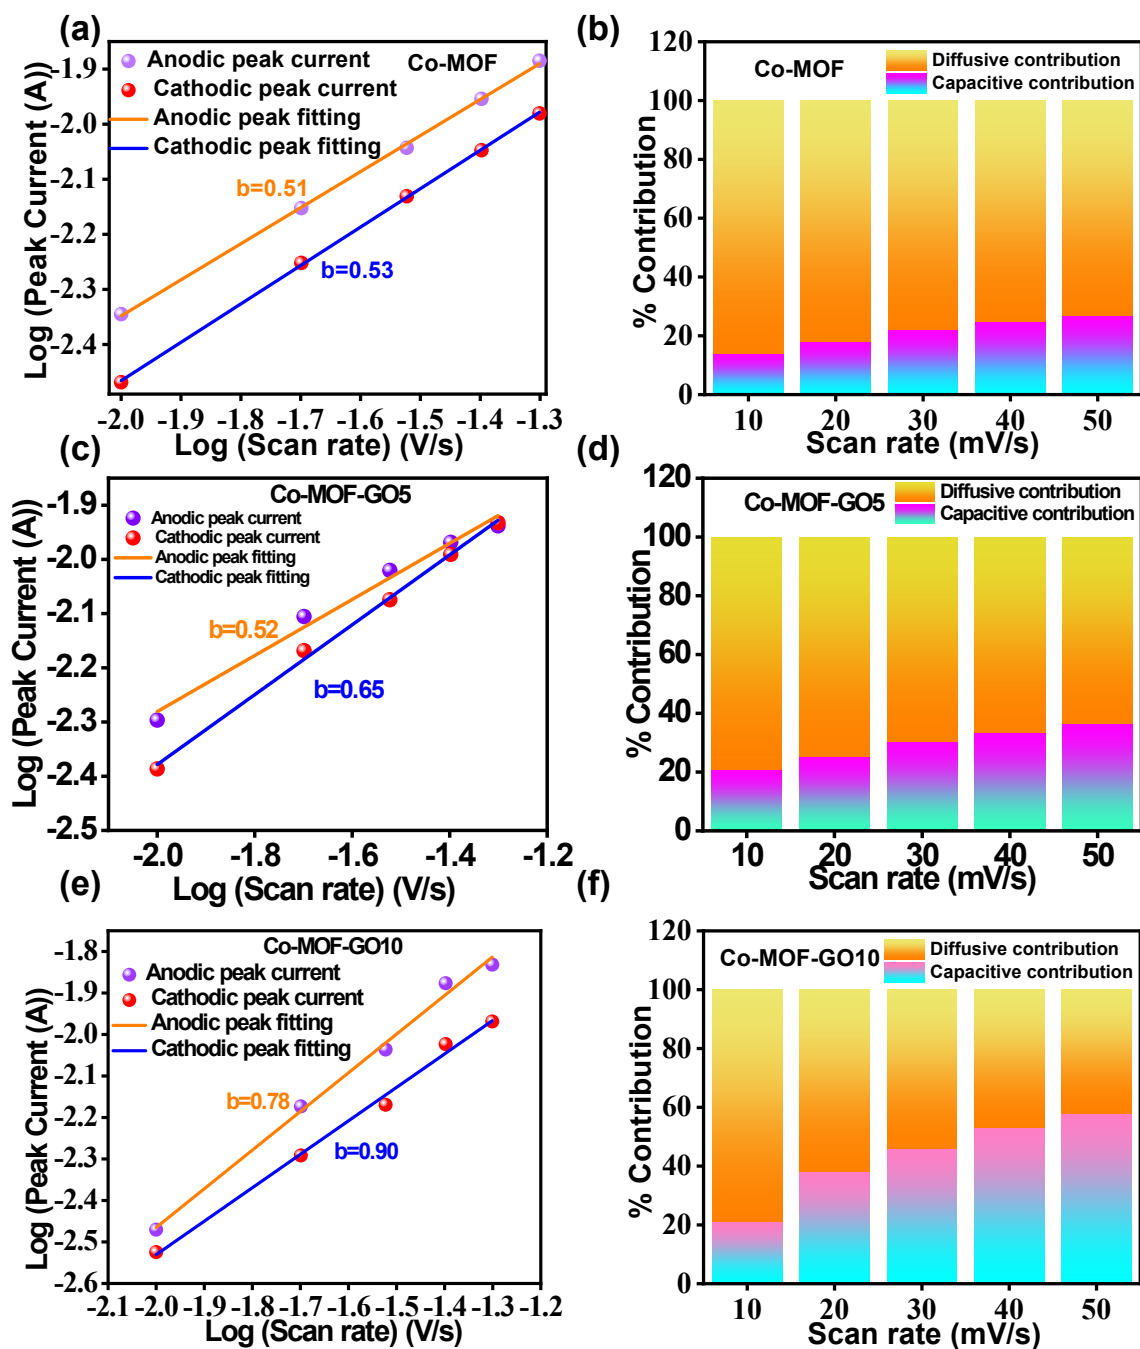

**Fig. S5.** Mechanistic insights into charge storage for Co-MOF-GO, Co-MOF-GO5 and Co-MOF-GO10. Calculation of  $b$  values from the anodic and cathodic peak-fitting plot and diffusive-capacitive contribution plot, (a-b) for Co-MOF; (c-d) for Co-MOF-GO5; and (e-f) for Co-MOF-GO10, respectively.

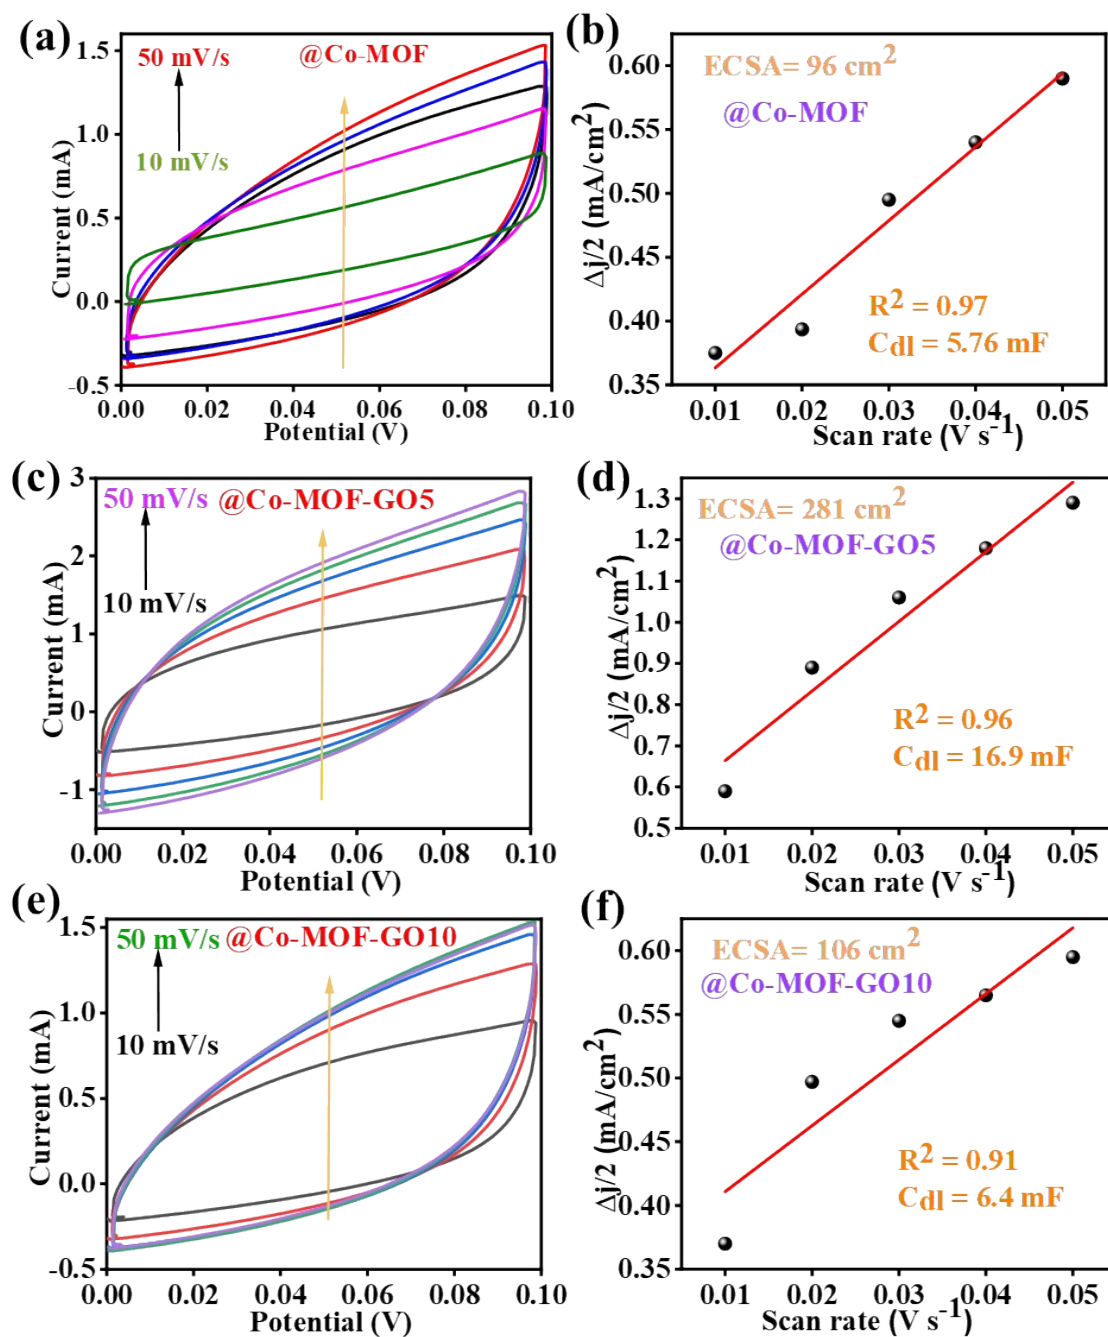

**Fig. S6.** (a, c, e) Cyclic voltammograms of Co-MOF, Co-MOF-GO5, and Co-MOF-GO10, respectively, at various scan rates measured in the non-Faradic region; (b, d, f) Corresponding plots for calculating the C<sub>dl</sub> and ECSA of Co-MOF, Co-MOF-GO5, and Co-MOF-GO10, respectively.

**Table S1:** Comparison of supercapacitive properties of Co-MOF-GO5 with recently reported MOFs and MOF-graphene composites

| Materials                                               | Potential window (V) | Electrolyte                           | Specific Capacitance (F g <sup>-1</sup> ) | Current Density (A g <sup>-1</sup> ) | Ref.                                                                |
|---------------------------------------------------------|----------------------|---------------------------------------|-------------------------------------------|--------------------------------------|---------------------------------------------------------------------|
| <b>MOF as electrode material</b>                        |                      |                                       |                                           |                                      |                                                                     |
| Cd-MOF                                                  | -0.8 to 0.4 V        | 1 M NaOH/KOH/LiOH                     | 647                                       | 4                                    | <i>Inorg. Chem.</i> , 2023, <b>62</b> , 3084-3094                   |
| Co(II)-TMU-63                                           | 0-0.5                | 2 M KOH                               | 384                                       | 6                                    | <i>Inorg. Chem.</i> , 2019, <b>58</b> , 16100-16111                 |
| Zn-CP                                                   | 0-0.55               |                                       | 377                                       | 1                                    | <i>Dalton Trans.</i> , 2023, <b>52</b> , 5943-5955                  |
| NH <sub>2</sub> -TMU-53                                 | 0-0.4                | 6 M KOH                               | 325                                       | 5                                    | <i>ACS Appl. Mater. Interfaces.</i> , 2019, <b>11</b> , 14759-14773 |
| Co(II)-TMU-63#CoMn <sub>2</sub> O <sub>4</sub> NCPs     | 0-0.5                | 2 M KOH                               | 1240                                      | 7                                    | <i>J. Mater. Chem. A.</i> , 2021, <b>9</b> , 11001-11012            |
| Co-MOF                                                  | 0-0.35               | 6 M KOH                               | 425                                       | 2                                    | <i>Dalton Trans.</i> , 2023, <b>52</b> , 14663-14675.               |
| <b>MOF@graphene</b>                                     |                      |                                       |                                           |                                      |                                                                     |
| Mo-MeIm derived MoO <sub>3</sub> /RGO                   | 0 - 0.8              | PVA-H <sub>2</sub> SO <sub>4</sub>    | 617                                       | 1                                    | <i>Adv. Mater.</i> , 2015, <b>27</b> , 4695-4701.                   |
| Cu-MOF@rGO                                              | -1-0.2               | 1 M Na <sub>2</sub> SO <sub>4</sub>   | 375                                       | 2                                    | <i>Inorg. Chem.</i> , 2019, <b>58</b> , 9844-9854.                  |
| Cu-MOF/rGO (SD)                                         | -0.5-0.7             | 1 M Na <sub>2</sub> SO <sub>4</sub>   | 685.33                                    | 1.6                                  | <i>J. Mater. Chem. A.</i> , 2016, <b>4</b> , 16432-16445.           |
| rGO/HKUST-1                                             | -0.1-1               | 0.5 M Na <sub>2</sub> SO <sub>4</sub> | 385                                       | 1                                    | <i>Electrochimica Acta</i> , 2015, <b>157</b> , 69-77.              |
| Co-MOF-RGO                                              | 0 - 0.6              | 6 M KOH                               | 430                                       | 1                                    | <i>Electrochimica Acta</i> , 2018, <b>275</b> , 76-86.              |
| Mn BTC derived Mn <sub>3</sub> O <sub>4</sub> /Graphene | -0.1 - 0.9           | 1 M Na <sub>2</sub> SO <sub>4</sub>   | 456                                       | 1                                    | <i>J. Mater. Sci.</i> , 2017, <b>52</b> , 446-457                   |
| UIO-66/RGO                                              | --                   | 6 M KOH                               | 302                                       | 0.15                                 | <i>Coord. Chem. Rev.</i> , 2018, <b>369</b> , 15-38.                |
| ZIF-67 derived LDH/GO Films                             | --                   | 6 M KOH                               | 273                                       | 1                                    | <i>Coord. Chem. Rev.</i> , 2018, <b>369</b> , 15-38.                |
| copper-1H-imidazole@activated carbon                    | 0-0.8                | 1 M KOH                               | 221                                       | 2                                    | <i>New J. Chem.</i> , 2018, <b>42</b> , 10300-10308.                |
| Ce-MOF/GO                                               | -0.2-0.4             | 3 M KOH                               | 233.8                                     | 1                                    | <i>RSC Adv.</i> , 2018, <b>8</b> , 3462-3469.                       |
| Ni-Co-MOF/GO                                            | -0.2 - 0.35          | 6 M KOH                               | 447.2                                     | 1                                    | <i>Electrochimica Acta</i> , 2019, <b>311</b> , 62-71               |
| nanocomposite CoSNC ((PPF-3) MOF)                       | 0-0.6                | 2 M KOH                               | 360.1                                     | 1.5                                  | <i>J. Am. Chem. Soc.</i> , 2016, <b>138</b> , 6924-6927             |
| ADC-C/rGO                                               | 0-0.5                | 2 M KOH                               | 308                                       | 2                                    | <i>ACS Appl. Energy Mater.</i> , 2019, <b>2</b> , 5029-5038.        |

|                  |               |                |            |          |                  |
|------------------|---------------|----------------|------------|----------|------------------|
| <b>Co-MO-GO5</b> | <b>0-0.47</b> | <b>1 M KOH</b> | <b>552</b> | <b>2</b> | <b>This Work</b> |
|------------------|---------------|----------------|------------|----------|------------------|
